# Supplementary material
Source: Frontiers journal article supplement (https://www.frontiersin.org/articles/9985)
Supplement: Data_Sheet_2.XLS [file Data_Sheet_2.XLS]

## Sheet: Sheet1
CNS Rich Genes					Less CNS Rich Duplicates
Rice Gene1	Sorghum Gene1	CNS Count1	Maize Gene1.1	Maize Gene1.2	Rice Gene2	Sorghum Gene2	CNS Count2	Maize Gene2.1	Maize Gene2.2
OS03G20090	SB01G037110	44	GRMZM2G070849	GRMZM2G134279	OS07G48870	SB02G043420	6		GRMZM2G176327
OS04G47860	SB06G025550	34	GRMZM2G129261		OS02G45054	SB04G032140	11	GRMZM2G090595
OS01G63770	SB03G040320	33	GRMZM2G127949		OS05G37470	SB09G021990	9	GRMZM2G325356||GRMZM2G067022
OS03G19780	SB01G037240	26	GRMZM2G302477		OS07G48900	SB02G043640	3	GRMZM2G041636
OS07G44710	SB02G040850	25	GRMZM2G015703	GRMZM2G422576||GRMZM2G056612	OS03G25070	SB01G034520	6	GRMZM2G040954	GRMZM2G117796
OS01G50370	SB03G032110	25	GRMZM2G041774	GRMZM2G173965||GRMZM2G305066	OS05G46750	SB09G027260	15	GRMZM2G476477
OS02G46610	SB04G031230	25	GRMZM2G004548	GRMZM2G091044	OS04G50120	SB06G027000	16	GRMZM2G131280	GRMZM2G086403
OS09G30190	SB02G027710	24	GRMZM2G149051||AC233861		OS08G38560	SB07G028670	10	GRMZM2G132763	GRMZM2G039431
OS02G51680	SB04G027650	23	GRMZM2G055150	GRMZM2G151044	OS06G11840	SB10G007770	7	GRMZM2G080354
OS01G65780	SB03G041660	21	GRMZM2G135743	GRMZM2G002023	OS05G35200	SB09G020910	2	GRMZM2G058472
OS05G51050	SB09G030200	21		GRMZM2G015692	OS01G42690	SB03G027720	10	GRMZM2G481362
OS01G61010	SB03G038420	20	GRMZM2G118441	GRMZM2G019413	OS05G39800	SB09G023320	8	GRMZM2G039173
OS03G07450	SB01G045740	20	GRMZM2G132367||GRMZM2G139963	GRMZM2G178741	OS10G26500	SB01G022420	7	GRMZM2G097349
OS04G50920	SB06G027290	20	GRMZM2G024898	GRMZM2G091331	OS02G47060	SB04G030930	7	GRMZM2G024505	GRMZM2G128402
OS09G36160	SB02G030800	20	GRMZM2G135783	GRMZM2G080295	OS08G43410	SB07G025020	7	GRMZM2G042407
OS01G50720	SB03G032260	20	GRMZM2G088783	GRMZM2G003406	OS05G46610	SB09G027200	18	GRMZM2G175232	GRMZM2G119693
OS04G48170	SB06G025820	20		GRMZM2G702529||GRMZM2G096086	OS02G45280	SB04G032020	9	GRMZM2G035309
OS01G58420	SB03G037080	20	GRMZM2G002119		OS05G41760	SB09G024395	11	GRMZM2G020150	GRMZM2G066158
OS07G07950	SB02G004230	20	GRMZM2G004301		OS03G57950	SB01G005450	14	GRMZM2G371210||GRMZM2G369130	GRMZM2G306062
OS02G42970	SB04G033570	20	GRMZM2G315140	GRMZM2G354151	OS04G45340	SB06G023780	14	GRMZM2G178998
OS02G51280	SB04G027960	19	GRMZM2G178603||GRMZM2G077755		OS06G12230	SB10G008030	9	GRMZM2G113888	GRMZM2G142751
OS03G07920	SB01G045450	19	GRMZM2G178852	GRMZM2G438606	OS10G25810	SB01G023080	2	GRMZM2G173732	GRMZM2G110473
OS10G37190	SB01G017150	19	GRMZM2G181231	GRMZM2G166719	OS03G02190	SB01G049750	7		GRMZM2G092776
OS02G05470	SB04G003470	18	GRMZM2G062885	GRMZM2G155370	OS06G48610	SB10G028840	1	GRMZM2G043348	GRMZM2G064050
OS05G38120	SB09G022270	18	GRMZM2G125976	GRMZM2G074645	OS01G62920	SB03G039840	14	GRMZM2G154641
OS06G12780	SB10G008370	18	GRMZM2G030292	GRMZM2G165969	OS02G50880	SB04G028270	3		GRMZM2G144501
OS03G44020	SB01G013640	18	GRMZM2G103559		OS12G42020	SB08G021520	3	GRMZM2G171822
OS04G48290	SB06G025870	18	GRMZM2G080992	GRMZM2G006212	OS02G45380	SB04G031980	9	GRMZM2G135175
OS11G06010	SB05G003740	17	GRMZM2G158281	GRMZM2G460472	OS12G06330	SB08G003770	9	GRMZM2G031656	GRMZM2G069408
OS03G20780	SB01G036740	17	GRMZM2G033570	GRMZM2G317584	OS07G48630	SB02G043350	1	GRMZM2G151811	GRMZM2G003558
OS02G38120	SB04G024760	17	GRMZM2G044359	GRMZM2G127924	OS04G40100	SB06G020070	3	GRMZM2G025880
OS09G28340	SB02G026580	17	GRMZM2G139522	GRMZM2G002104	OS08G36820	SB07G022970	7	GRMZM2G386460	GRMZM2G054139
OS04G45070	SB06G023630	17	GRMZM2G123200||GRMZM2G122937	GRMZM2G116538	OS02G42880	SB04G033660	2	GRMZM2G066997
OS09G21380	SB02G023740	17	GRMZM2G055809		OS08G32520	SB07G020520	1	GRMZM2G097342
OS05G50370	SB09G029580	17	GRMZM2G438895		OS01G44310	SB03G028900	4	GRMZM2G316635
OS04G46060	SB06G024220	17	GRMZM2G123387		OS02G43560	SB04G033240	11		GRMZM2G416018
OS02G50490	SB04G028520	17	GRMZM2G076049		OS06G13830	SB10G008880	5	GRMZM2G154678
OS02G53530	SB04G034740	17	GRMZM2G085945	GRMZM2G121151	OS06G10470	SB10G006760	1	GRMZM2G159402	GRMZM2G016744
OS01G61980	SB03G039130	17	GRMZM2G124016	GRMZM2G336557	OS05G38690	SB09G022730	8	GRMZM2G399495	GRMZM2G178815
OS01G66490	SB03G042210	17	GRMZM2G140174		OS05G34600	SB09G020590	11	GRMZM2G147867	GRMZM2G134687
OS10G33310	SB01G019550	17	GRMZM2G116885	GRMZM2G037926	OS03G04490	SB01G047750	12	GRMZM2G157510
OS08G40500	SB07G026760	16	GRMZM2G337190	GRMZM2G004898	OS09G32350	SB02G028962	7		GRMZM2G388297
OS06G37560	SB10G022620	16	GRMZM2G027385		OS02G12730	SB04G007660	2		GRMZM2G121495
OS07G02800	SB02G001600	16	GRMZM2G100176	GRMZM2G119940||GRMZM2G173882	OS03G55590	SB01G007130	5	GRMZM2G124540	GRMZM2G171468
OS12G40890	SB08G020580	16	GRMZM2G079957	GRMZM2G167794||GRMZM2G138268	OS03G43400	SB01G014120	0	GRMZM2G366373	GRMZM2G128421
OS04G47890	SB06G025600	16	GRMZM2G069525	GRMZM2G090230	OS02G45080	SB04G032130	6	GRMZM2G106185
OS12G42610	SB08G022030	16	GRMZM2G141955	GRMZM2G116646	OS03G44710	SB01G013270	5	GRMZM2G085873
OS05G47650	SB09G027530	16	GRMZM2G059939	GRMZM2G159592	OS01G49830	SB03G031860	10	GRMZM2G169654	GRMZM2G065538
OS01G43910	SB03G028740	16		GRMZM2G131334||GRMZM2G375975	OS05G50560	SB09G028690	1	GRMZM2G163861	GRMZM2G034052||GRMZM2G063144
OS01G63310	SB03G040110	16		GRMZM2G440785	OS05G37800	SB09G022070	7	GRMZM2G084899	GRMZM2G107721
OS04G38740	SB06G019020	15	GRMZM2G032655		OS02G36890	SB04G024000	12	GRMZM2G001223
OS03G59240	SB01G004360	15	GRMZM2G082312		OS07G10530	SB02G006130	9	GRMZM2G125420
OS04G39240	SB06G019400	15	GRMZM2G050435		OS02G37120	SB04G024170	7	GRMZM2G131727
OS02G51110	SB04G028020	15	GRMZM2G028325		OS06G12310	SB10G008090	6	GRMZM2G081239	GRMZM2G137108
OS01G50616	SB03G032235	15		GRMZM2G157043	OS05G46720	SB09G027220	9	GRMZM2G174990	GRMZM2G355610
OS06G46330	SB10G027140	15		GRMZM2G119714	OS02G06930	SB04G004440	7		GRMZM2G169020
OS04G46680	SB06G024690	15	GRMZM2G170520		OS02G44130	SB04G032800	8		GRMZM2G315079
OS01G65370	SB03G041360	15	GRMZM2G160838	GRMZM2G405094	OS05G35500	SB09G021265	4	GRMZM2G077789	GRMZM2G431156
OS12G42220	SB08G021750	15	GRMZM2G088312		OS03G44250	SB01G013580	3	GRMZM2G383338
OS10G28210	SB01G021880	15	GRMZM2G110681		OS03G06680	SB01G046300	12	GRMZM2G136081
OS04G51190	SB06G027465	15	GRMZM2G041223	GRMZM2G129147	OS02G47280	SB04G030770	8	GRMZM2G034876
OS08G36390	SB07G022700	15	GRMZM2G123094		OS09G27650	SB02G026230	8	GRMZM2G141031	GRMZM2G110107
OS03G59570	SB01G003950	15	GRMZM2G116878		OS07G11050	SB02G006400	6		GRMZM2G018046
OS03G22490	SB01G035560	15	GRMZM2G075502	GRMZM2G121360	OS07G47480	SB02G042510	5	GRMZM2G113863	GRMZM2G123486
OS02G50960	SB04G028170	15	GRMZM2G074267	GRMZM2G149184	OS06G12610	SB10G008290	5	GRMZM2G098643
OS03G04020	SB01G048190	14	GRMZM2G095968	GRMZM2G127072	OS10G39640	SB01G030330	2	GRMZM2G026147	GRMZM2G127072
OS09G28390	SB02G026600	14	GRMZM2G065928	GRMZM2G002142	OS08G36860	SB07G022990	5		GRMZM2G105954
OS04G48270	SB06G025860	14	GRMZM2G081032	GRMZM2G077069	OS02G45320	SB04G032000	5		GRMZM2G137029
OS06G13600	SB10G008760	14		GRMZM2G107092	OS02G50640	SB04G028430	5	GRMZM2G398809||GRMZM2G078725
OS07G03140	SB02G001900	14	GRMZM2G350205		OS03G55890	SB01G006930	11		GRMZM2G052476
OS06G08720	SB10G005870	14	GRMZM2G128056		OS02G55130	SB04G035810	8	GRMZM2G178933
OS01G43510	SB03G028390	14	GRMZM2G480687||GRMZM2G480686	GRMZM2G158647	OS05G50730	SB09G029890	7		GRMZM2G128726
OS02G08400	SB04G005470	14	GRMZM2G479325		OS06G44100	SB10G025680	12	GRMZM2G050137	GRMZM2G049730
OS12G42570	SB08G022010	14		GRMZM2G078090	OS03G44670	SB01G013300	3	GRMZM2G146616
OS03G17850	SB01G038640	14	GRMZM2G001079	GRMZM2G118922	OS07G49370	SB02G044020	0		GRMZM2G076307
OS06G48040	SB10G028510	14	GRMZM2G701551		OS02G05692	SB04G003650	3	GRMZM2G392320
OS08G39390	SB07G028010	14	GRMZM2G445684	GRMZM2G071101	OS09G31140	SB02G028220	2	GRMZM2G084014
OS04G32030	SB06G013950	14	GRMZM2G155281	GRMZM2G122437	OS02G30650	SB04G020690	2	GRMZM2G111872
OS07G46490	SB02G041770	14		GRMZM2G163826	OS03G24160	SB01G034993	0	GRMZM2G116010	GRMZM2G033273
OS09G29100	SB02G027020	13	GRMZM2G140633	GRMZM2G178229	OS08G37390	SB07G023350	10	GRMZM2G133413
OS04G45650	SB06G023940	13	GRMZM2G404973	GRMZM2G054615	OS02G43150	SB04G033450	4	GRMZM2G140669
OS08G36740	SB07G022920	13	GRMZM2G134735	GRMZM2G471635	OS09G28210	SB02G026530	13	GRMZM2G045431	GRMZM2G414252
OS06G37450	SB10G022580	13	GRMZM2G039586		OS02G12790	SB04G007750	9	GRMZM2G031983
OS08G33590	SB07G021170	13	GRMZM2G107276	GRMZM2G526668	OS09G24490	SB02G024460	9		GRMZM2G176141
OS09G28210	SB02G026530	13	GRMZM2G045431	GRMZM2G414252	OS08G36740	SB07G022920	13	GRMZM2G134735	GRMZM2G471635
OS03G41110	SB01G014840	13	GRMZM2G082686	GRMZM2G400281	OS12G39220	SB08G019420	9	GRMZM2G426122
OS04G43070	SB06G022230	13	GRMZM2G118950	GRMZM2G175140	OS02G40710	SB04G026290	0	GRMZM2G028736
OS06G46250	SB10G027090	13	GRMZM2G166430	GRMZM2G128560	OS02G06960	SB04G004450	8	GRMZM2G158520	GRMZM2G168984
OS08G33910	SB07G021400	13	GRMZM2G152543||AC198937		RICE_9_14685186_14685553	SB02G024593	0	GRMZM2G159094
OS01G60860	SB03G038360	13	GRMZM2G027375	GRMZM2G019777	OS05G39930	SB09G023380	5	GRMZM2G125034
OS09G26590	SB02G025610	13	GRMZM2G011463	GRMZM2G045243	OS08G35110	SB07G022190	3	GRMZM2G059138	GRMZM2G076345
OS08G35190	SB07G022240	13	GRMZM2G125557		OS09G26620	SB02G025640	2	GRMZM2G099049	GRMZM2G005146
OS06G46410	SB10G027220	13	GRMZM2G035405	GRMZM2G089640	OS02G06910	SB04G004430	4		GRMZM2G028980
OS07G41280	SB02G038710	13	GRMZM2G136918		OS03G30300	SB01G032450	6	GRMZM2G074946
OS01G51140	SB03G032520	13	GRMZM2G111666	GRMZM2G164341	OS05G46370	SB09G027030	3	GRMZM2G094892
OS07G43950	SB02G040350	13	GRMZM2G060594		OS03G25770	SB01G034200	1	GRMZM2G301297||AC203812
OS05G51390	SB09G030510	13	GRMZM2G073634		OS01G40630	SB03G026430	8	GRMZM2G059392
OS05G39760	SB09G023300	13	GRMZM2G127297		OS01G61030	SB03G038450	2	GRMZM2G118363
OS06G41010	SB10G024060	12	GRMZM2G099034		OS02G10200	SB04G006530	5	GRMZM2G087719	GRMZM2G058866
OS06G44930	SB10G026290	12	GRMZM2G331766	GRMZM2G372892	OS02G08000	SB04G005125	5	GRMZM2G536238
OS03G03660	SB01G048570	12	GRMZM2G032852		OS10G39420	SB01G030450	3	GRMZM2G040743
OS07G48310	SB02G043090	12	GRMZM2G080270		OS03G21510	SB01G036290	10	GRMZM2G016480
OS03G58110	SB01G005300	12	GRMZM2G070322	GRMZM2G099491	OS07G07990	SB02G004260	4	GRMZM2G153741	GRMZM2G176394
OS02G53690	SB04G034800	12	GRMZM2G048993	GRMZM2G105335	OS06G10310	SB10G006690	3	GRMZM2G067743||AY530952
OS03G19200	SB01G037630	12	GRMZM2G010000	GRMZM2G031637	OS07G49000	SB02G043740	3	GRMZM2G113036	GRMZM2G303525
OS01G48960	SB03G031310	12	GRMZM2G085078	GRMZM2G077054	RICE_5_27539704_27544851	SB09G027910	1	GRMZM2G375064
OS06G10650	SB10G006850	12	GRMZM2G070315	GRMZM2G134389	OS02G53160	SB04G034500	8	GRMZM2G084086	GRMZM2G126765
OS07G44820	SB02G040970	12	GRMZM2G120971	GRMZM2G159200	OS03G24950	SB01G034540	2		GRMZM2G178663
OS06G10230	SB10G006670	12	GRMZM2G080103	GRMZM2G383680	RICE_2_32877490_32880864	SB04G034820	3	GRMZM2G463904
OS09G29130	SB02G027040	12		GRMZM2G389379	OS08G37400	SB07G023360	3	GRMZM2G346920
OS05G39500	SB09G023120	12	GRMZM2G359892	GRMZM2G413687	OS01G61310	SB03G038670	4	GRMZM2G034810	GRMZM2G135332
OS08G41320	SB07G026610	12	GRMZM2G046493		OS09G32510	SB02G029040	8	GRMZM2G144275	GRMZM2G083504
OS04G42770	SB06G021940	12	GRMZM2G051932		OS02G40410	SB04G026030	3	GRMZM2G026839
OS03G07890	SB01G045490	12	GRMZM2G000741	GRMZM2G169363	OS10G25830	SB01G023070	2		GRMZM2G043182
OS01G65380	SB03G041370	12	GRMZM2G081652	GRMZM2G033649	OS05G35460	SB09G021240	3	GRMZM2G033641
OS04G49110	SB06G026240	12	GRMZM2G109869	GRMZM2G173429	OS02G45760	SB04G031770	0		GRMZM2G028438
OS04G40150	SB06G020110	11	GRMZM2G062488		OS02G38140	SB04G024790	2	GRMZM2G079682	GRMZM2G104118
OS02G07960	SB04G005115	11	GRMZM2G335638	GRMZM2G020986	OS06G45020	SB10G026340	8	GRMZM2G085246
OS11G07910	SB05G005240	11		GRMZM2G087212	OS12G07670	SB08G004730	3	GRMZM2G026231
OS02G42020	SB04G026730	11	GRMZM2G153263	GRMZM2G165778	OS04G44210	SB06G022910	8	GRMZM2G306741
OS04G43680	SB06G022660	11	GRMZM2G048295||AC206901		OS02G41510	SB04G026480	4	GRMZM2G095904	GRMZM2G127857
OS01G65630	SB03G041560	11	GRMZM2G129361		OS05G35230	SB09G020950	3	GRMZM2G032865
OS02G41580	SB04G026490	11	GRMZM2G096753||GRMZM2G178074	GRMZM2G135091	OS04G43710	SB06G022690	2	GRMZM2G049541
OS07G05720	SB02G003070	11		GRMZM2G020805	OS03G57190	SB01G006020	0	GRMZM2G115516	GRMZM2G089361
OS02G51370	SB04G027900	11	GRMZM2G118366	GRMZM2G041809	OS06G12190	SB10G007980	0		GRMZM2G383680
OS01G61620	SB03G038890	11		GRMZM2G357873	OS05G39080	SB09G022950	4	GRMZM2G088409	GRMZM2G068192
OS02G15230	SB04G009090	11	GRMZM2G159759||GRMZM2G029400	GRMZM2G004835	OS06G34070	SB10G020940	5	GRMZM2G469898
OS05G44200	SB09G025780	11	GRMZM2G141762		OS01G54470	SB03G034560	1	GRMZM2G478414
OS09G33600	SB02G029540	11	GRMZM2G059225		OS08G42530	SB07G025880	5	GRMZM2G020461
OS05G46580	SB09G027190	11		GRMZM2G168681	OS01G50760	SB03G032280	4	GRMZM2G098569	GRMZM2G147721
OS08G31980	SB07G020270	11	GRMZM2G008226	GRMZM2G366659	OS09G20990	SB02G023610	5		GRMZM2G077659
OS03G08170	SB01G045260	11	GRMZM2G175164		OS10G25550	SB01G023180	5		GRMZM2G110968
OS07G41160	SB02G038620	11	GRMZM2G438290		OS03G30570	SB01G032370	2	GRMZM2G067371	GRMZM2G053831
OS09G31438	SB02G028420	11	GRMZM2G307588	GRMZM2G126018	OS08G39890	SB07G027740	11	GRMZM2G160917	GRMZM2G460544
OS02G08540	SB04G005610	11	GRMZM2G057057	GRMZM2G133653	OS06G43870	SB10G025450	7	GRMZM2G050912	GRMZM2G134863
OS02G34970	SB04G022672	11	GRMZM2G094067		OS04G35660	SB06G017190	7	GRMZM2G316840
OS12G42420	SB08G021920	11	GRMZM2G091278	GRMZM2G349268	OS03G44580	SB01G013410	1	GRMZM2G324276||AC211276
OS08G37350	SB07G023330	11	GRMZM2G136443		OS09G28940	SB02G026980	9	GRMZM2G000404
OS02G53360	SB04G034665	11	GRMZM2G134552	GRMZM2G165991	OS06G10570	SB10G006810	6	GRMZM2G033915
OS02G32950	SB04G021650	11		GRMZM2G156079	OS04G33570	SB06G015490	0	GRMZM2G075081||AC217051
OS01G71320	SB03G045420	11	GRMZM2G068913	GRMZM2G467069	OS05G31110	SB09G018720	2	GRMZM2G046686
OS05G50380	SB09G029610	11	GRMZM2G027955		OS01G44220	SB03G028850	3	GRMZM2G429899
OS02G32520	SB04G021410	11	GRMZM2G172230		OS04G33210	SB06G015220	1	GRMZM2G149567
OS01G46800	SB03G029920	11	GRMZM2G408462	GRMZM2G411766	OS05G49620	SB09G029050	2		GRMZM2G063880
OS08G36020	SB07G022540	11		GRMZM2G037941	OS09G27220	SB02G026020	1	GRMZM2G429658	GRMZM2G066672
OS08G39890	SB07G027740	11	GRMZM2G160917	GRMZM2G460544	OS09G31438	SB02G028420	11	GRMZM2G307588	GRMZM2G126018
OS05G50340	SB09G029560	11	GRMZM2G114503		OS01G44370	SB03G028950	1	GRMZM2G451116||GRMZM2G150260
OS01G49390	SB03G031570	10	GRMZM2G415751	GRMZM2G393014	OS05G47840	SB09G027683	5	GRMZM2G025429
OS08G43470	SB07G024960	10	GRMZM2G037655		OS09G36370	SB02G031010	3	GRMZM2G147459	GRMZM2G130278
OS02G50130	SB04G028750	10	GRMZM2G090419	GRMZM2G063276	OS06G14420	SB10G009220	1	GRMZM2G308595	GRMZM2G476323
OS06G45140	SB10G026450	10	GRMZM2G103647		OS02G07840	SB04G005020	5	GRMZM2G098904
OS05G44270	SB09G025820	10	GRMZM2G174558	GRMZM2G180668	OS01G54400	SB03G034490	5	GRMZM2G314520
OS05G37030	SB09G021760	10	GRMZM2G392918	GRMZM2G356162	OS01G64380	SB03G040750	0	GRMZM2G133291
OS04G33460	SB06G015360	10	GRMZM2G073054		OS02G32660	SB04G021540	5	GRMZM2G032628
OS04G44670	SB06G023313	10	GRMZM2G026926	GRMZM2G040664	RICE_2_25589655_25591392	SB04G027180	0	GRMZM2G139765||GRMZM2G055204	GRMZM2G300924||GRMZM2G029323
OS01G61590	SB03G038870	10		GRMZM2G311220	OS05G39090	SB09G022960	4	GRMZM2G088361	GRMZM2G030673
OS04G40640	SB06G020450	10	GRMZM2G022255	GRMZM2G041513	OS02G38330	SB04G024960	4	GRMZM2G121160
OS04G35240	SB06G016960	10	GRMZM2G155593		OS02G34600	SB04G022410	9	GRMZM2G000278	GRMZM2G130018
OS09G24480	SB02G024450	10	GRMZM2G064628	GRMZM2G110242||GRMZM2G088440	OS08G33530	SB07G021140	1	GRMZM2G166687	GRMZM2G060319
OS02G55870	SB04G036200	10	GRMZM2G083812		OS06G08090	SB10G005260	3		GRMZM2G148167
OS02G55250	SB04G035890	10	GRMZM2G336408	GRMZM2G316749	OS06G08500	SB10G005650	4	GRMZM2G067654
OS09G33490	SB02G029460	10	GRMZM2G054277	GRMZM2G179049	OS08G42400	SB07G025990	4	GRMZM2G054383	GRMZM2G100583
OS09G30486	SB02G028120	10	GRMZM2G174799	GRMZM2G081017	OS08G39270	SB07G028140	9	GRMZM2G354560||AC234156
OS02G41460	SB04G026450	10	GRMZM2G095382||GRMZM2G168371	GRMZM2G459645	OS04G43580	SB06G022610	6	GRMZM2G147241	GRMZM2G061499
OS04G33560	SB06G015480	10	GRMZM2G062504||AC217051		OS02G32850	SB04G021620	3	GRMZM2G038497
OS01G42960	SB03G027890	10	GRMZM2G093436	GRMZM2G128658	OS05G50990	SB09G030170	6		GRMZM2G318270
OS05G50080	SB09G029330	10	GRMZM2G149347		OS01G45730	SB03G029410	9	GRMZM2G157927	GRMZM2G116416
OS04G45810	SB06G024000	10	GRMZM2G351330		OS02G43330	SB04G033380	6	GRMZM2G117164
OS01G61720	SB03G038960	10	GRMZM2G155954		OS05G38790	SB09G022790	1	GRMZM2G066448
OS02G50320	SB04G028640	10	GRMZM2G481740		OS06G14080	SB10G009020	3		AC213373||GRMZM2G085195
OS09G24800	SB02G024640	10	GRMZM2G045748||AC165178		OS08G33940	SB07G021420	1	GRMZM2G024468||GRMZM2G131937	GRMZM2G111117
OS03G44610	SB01G013400	10	GRMZM2G038988		OS12G42430	SB08G021930	3	GRMZM2G008731
OS01G58910	SB03G037390	10	GRMZM2G042364		OS05G41420	SB09G024200	3	GRMZM2G140805	GRMZM2G034815
OS01G53710	SB03G034070	10	GRMZM2G051288		OS05G44910	SB09G026140	3	GRMZM2G031435
OS01G65330	SB03G041340	10	GRMZM2G046846	GRMZM2G148773	OS05G35530	SB09G021280	7		GRMZM2G097502
OS01G65480	SB03G041460	10	GRMZM2G049373	GRMZM2G156285	OS05G35340	SB09G021110	2	GRMZM2G175860
OS01G62110	SB03G039240	10	GRMZM2G302171		OS05G38660	SB09G022700	2		GRMZM2G148366
OS02G07770	SB04G004930	10	GRMZM2G052544		OS06G45410	SB10G026550	7	GRMZM2G081671
OS02G40530	SB04G026210	10	GRMZM2G027697	GRMZM2G043792	OS04G42950	SB06G022090	7		GRMZM2G410083
OS01G72490	SB03G046170	10		GRMZM2G077752	OS05G32070	SB09G019040	7	GRMZM2G450459
OS04G32300	SB06G014300	10	GRMZM2G480903		OS02G30850	SB04G020790	5	GRMZM2G470756
OS01G65920	SB03G041770	9	GRMZM2G138176		OS05G35110	SB09G020840	2	GRMZM2G153075
OS01G54050	SB03G034300	9	GRMZM2G039246		OS05G44570	SB09G026030	1		GRMZM2G173710
OS06G43630	SB10G025240	9	GRMZM2G049076	GRMZM2G471083	OS02G09170	SB04G005720	5	GRMZM2G462613
OS04G50216	SB06G027060	9		GRMZM2G128078||AC195235	OS02G46660	SB04G031180	1	GRMZM2G120035
OS06G44420	SB10G026030	9	GRMZM2G090266		OS02G08170	SB04G005270	3	GRMZM2G449257	GRMZM2G405022
OS12G41650	SB08G021000	9	GRMZM2G087622		OS03G43810	SB01G013843	2	GRMZM2G165042||GRMZM2G065374
OS02G50460	SB04G028560	9	GRMZM2G151204		OS06G13870	SB10G008890	5	GRMZM2G027326
OS06G40150	SB10G023600	9		GRMZM2G106591	OS02G10760	SB04G006970	3	GRMZM2G085678
OS02G44360	SB04G032570	9		GRMZM2G098800	OS04G46860	SB06G024820	4	GRMZM2G079980	GRMZM2G037792
OS02G04840	SB04G003250	9		GRMZM2G165931	OS06G48940	SB10G029125	7	GRMZM2G098900
OS08G31660	SB07G020110	9		GRMZM2G066599	OS09G20460	SB02G023320	6	GRMZM2G126413
OS05G37080	SB09G021780	9	GRMZM2G465835	GRMZM2G134687||GRMZM2G172264	OS01G64310	SB03G040720	8	GRMZM2G334796
OS07G47360	SB02G042440	9	GRMZM2G144971	GRMZM2G171068	OS03G22580	SB01G035500	3	GRMZM2G552278
OS04G33640	SB06G015590	9	GRMZM2G076584		OS02G33000	SB04G021700	2		GRMZM2G177510
OS07G41600	SB02G038890	9	GRMZM2G049077	GRMZM2G437050	OS03G29920	SB01G032650	3	GRMZM2G313009
OS04G50090	SB06G026970	9		GRMZM2G086474	OS02G46560	SB04G031250	5	GRMZM2G111146	GRMZM2G390050
OS05G50470	SB09G029660	9	GRMZM2G321778		OS01G44140	SB03G028830	5	GRMZM2G130354	GRMZM2G109144
OS04G49410	SB06G026480	9	GRMZM2G356273	GRMZM2G072121	OS02G45940	SB04G031620	1		GRMZM2G084195
OS01G63580	SB03G040260	9	GRMZM2G083195		OS05G37600	SB09G022020	3		GRMZM2G075295
OS08G39450	SB07G027940	9	GRMZM2G441903		OS09G31200	SB02G028240	7	GRMZM2G083894
OS09G20000	SB02G023130	9	GRMZM2G086066	GRMZM2G161846	OS08G31140	SB07G020020	2		AC217910
OS09G23620	SB02G024250	9	GRMZM2G169356||GRMZM2G071272	GRMZM2G115859	OS08G33150	SB07G020880	9	GRMZM2G106558
OS09G35600	SB02G030360	9	GRMZM2G143400	GRMZM2G123973	OS08G43250	SB07G025190	7	AC206030
OS06G43680	SB10G025310	9	GRMZM2G087806	GRMZM2G024437	OS02G09130	SB04G005696	2	GRMZM2G409934
OS07G07230	SB02G003860	9	GRMZM2G075268		OS03G57780	SB01G005560	5	GRMZM2G120657
OS09G27010	SB02G025910	9	GRMZM2G004207		OS08G35600	SB07G022400	2	GRMZM2G101245
OS05G47810	SB09G027650	9		GRMZM2G171213	OS01G49440	SB03G031600	6	GRMZM2G031993	GRMZM2G085408
OS05G41480	SB09G024250	9	GRMZM2G090300	GRMZM2G062555	OS01G58870	SB03G037360	4	GRMZM2G130558||AC204359
OS09G20350	SB02G023230	9	GRMZM2G141679		OS08G31580	SB07G020090	5	GRMZM2G061487
OS07G46570	SB02G041880	9	GRMZM2G009804		OS03G24030	SB01G035080	0	GRMZM2G362281
OS10G28700	SB01G021740	9	GRMZM2G343854		OS03G06430	SB01G046440	2	GRMZM2G453139
OS06G07830	SB10G005090	9	GRMZM2G167165||AC234171		OS02G55970	SB04G036280	3		GRMZM2G178955
OS01G48060	SB03G030740	9	GRMZM2G437460||GRMZM2G056120		OS05G48870	SB09G028450	8	GRMZM2G030710
OS03G44310	SB01G013530	9		GRMZM2G018943	OS12G42260	SB08G021810	4	GRMZM2G099542
OS08G42470	SB07G025920	9	GRMZM2G046493	GRMZM2G145579	OS09G33580	SB02G029530	4	GRMZM2G144275	GRMZM2G178182
OS08G33150	SB07G020880	9	GRMZM2G106558		OS09G23620	SB02G024250	9	GRMZM2G169356||GRMZM2G071272	GRMZM2G115859
OS09G32670	SB02G029130	9	GRMZM2G429118		OS08G41440	SB07G026520	8	GRMZM2G161233	GRMZM2G052357
OS05G44400	SB09G025950	9		GRMZM2G135381	OS01G54210	SB03G034360	6	GRMZM2G123909	GRMZM2G044576
OS05G44090	SB09G025650	9	GRMZM2G127680		OS01G54570	SB03G034650	8	GRMZM2G127431
OS02G38410	SB04G025000	9		GRMZM2G132682	OS04G40680	SB06G020540	8	GRMZM2G045117
OS09G27450	SB02G026150	9	GRMZM2G127537	GRMZM2G366130	OS08G36220	SB07G022620	8	GRMZM2G142962
OS01G57580	SB03G036670	9	GRMZM2G440529		OS05G42180	SB09G024720	4	GRMZM2G313058
OS04G42470	SB06G021780	9	GRMZM2G366150		OS02G39970	SB04G025890	4	GRMZM2G373132
OS03G20340	SB01G037030	9	GRMZM2G138814	GRMZM2G064725	OS07G48790	SB02G043500	2	GRMZM2G130950
OS05G45210	SB09G026320	9	GRMZM2G043435		RICE_1_30948925_30949518	SB03G033800	0	GRMZM2G138152||GRMZM2G431506
OS09G36560	SB02G031120	9	GRMZM2G154449		OS08G43510	SB07G024920	5	GRMZM2G049057
OS02G39910	SB04G025830	9	GRMZM2G443548		OS04G42310	SB06G021690	3		GRMZM2G000261
OS01G48530	SB03G031020	9	GRMZM2G076064	GRMZM2G012405	OS05G48570	SB09G028180	8		GRMZM2G112085
OS06G12590	SB10G008270	9	GRMZM2G048243		OS02G50970	SB04G028160	7	GRMZM2G140635
OS08G36450	SB07G022740	9		GRMZM2G423292	OS09G27850	SB02G026310	1	GRMZM2G092409	GRMZM2G134866
OS05G50260	SB09G029500	9		GRMZM2G002034	OS01G44970	SB03G029030	7	GRMZM2G037431
OS01G52160	SB03G033050	9	GRMZM2G150450	GRMZM2G042019||GRMZM2G028134	OS05G45820	SB09G026655	1	GRMZM2G377663
OS09G27590	SB02G026180	9	GRMZM2G088874	GRMZM2G063647	OS08G36380	SB07G022690	7	GRMZM2G155340
OS12G42310	SB08G021850	9	GRMZM2G028700	GRMZM2G009593	OS03G44500	SB01G013460	7	GRMZM2G070323
RICE_7_1296771_1297896	SB02G002080	9	GRMZM2G008234	GRMZM2G146729||GRMZM2G146688	OS03G56050	SB01G006830	5	GRMZM2G028151
OS11G05470	SB05G003200	9	GRMZM2G132880		OS12G05590	SB08G003210	7	GRMZM2G338454	GRMZM2G092008
OS09G32100	SB02G028790	9	GRMZM2G038931		OS08G40940	SB07G027210	0	GRMZM2G067238
OS09G23084	SB02G024050	8		GRMZM2G703265	OS08G32940	SB07G020700	4	GRMZM2G167669
OS02G12820	SB04G007790	8	GRMZM2G170559		OS06G37410	SB10G022530	1	GRMZM2G340177
OS02G54130	SB04G035120	8	GRMZM2G098058	GRMZM2G064537	OS06G09560	SB10G006350	1	GRMZM2G070475
OS06G35940	SB10G021790	8	GRMZM2G400167		OS02G13830	SB04G008320	3	GRMZM2G108016
OS01G64970	SB03G041110	8	GRMZM2G110922	GRMZM2G334791	OS05G35760	SB09G021410	0	GRMZM2G063961
OS02G42040	SB04G026740	8		GRMZM2G418604	OS04G44220	SB06G022920	8	GRMZM2G306735
OS02G37850	SB04G024480	8	GRMZM2G352255||GRMZM2G089517		OS04G39670	SB06G019780	5	GRMZM2G165755
OS01G60810	SB03G038320	8	GRMZM2G330159||AC204502		OS05G39950	SB09G023390	1	GRMZM2G026927
OS04G35520	SB06G017080	8		GRMZM2G332922	OS02G34810	SB04G022560	2	GRMZM2G006791
OS04G42520	SB06G021810	8	GRMZM2G170101		OS02G40010	SB04G025930	6	GRMZM2G071846	GRMZM2G179810
OS02G36924	SB04G024010	8		GRMZM2G055782	OS04G38770	SB06G019040	6	GRMZM2G032905
OS02G41630	SB04G026510	8	GRMZM2G074604||GRMZM2G029048	GRMZM2G160541	OS04G43760	SB06G022740	3	GRMZM2G441347
OS12G06540	SB08G003950	8		GRMZM2G146018	OS11G06180	SB05G003820	4	GRMZM2G091656
OS03G58830	SB01G004710	8	GRMZM2G137358		OS07G09590	SB02G005713	4		GRMZM2G008898
OS02G35910	SB04G023510	8	GRMZM2G052699		OS04G37660	SB06G018260	2	GRMZM2G015610	GRMZM2G044382
OS07G46450	SB02G041730	8	GRMZM2G036872	GRMZM2G340359	OS03G24180	SB01G034990	2	GRMZM2G115975
OS08G40850	SB07G027010	8	GRMZM2G149480		OS09G32200	SB02G028820	2	GRMZM2G080243
OS08G36790	SB07G022965	8	GRMZM2G478417	GRMZM2G157722	OS09G28310	SB02G026570	2		GRMZM2G002075
OS01G53880	SB03G034170	8	GRMZM2G057067		OS05G44810	SB09G026100	4	GRMZM2G074427
OS04G44220	SB06G022920	8	GRMZM2G306735		OS02G42040	SB04G026740	8		GRMZM2G418604
OS01G60770	SB03G038290	8	GRMZM2G339122		OS05G39990	SB09G023440	5	GRMZM2G361064
OS05G29974	SB09G018060	8		GRMZM2G306851	OS01G21300	SB03G012970	1	GRMZM2G080320
OS05G42150	SB09G024710	8		GRMZM2G366873	OS01G57610	SB03G036680	2	GRMZM2G061515
OS05G39580	SB09G023180	8	GRMZM2G047677		OS01G61210	SB03G038600	3	GRMZM2G141382	GRMZM2G169695
OS02G52780	SB04G034190	8	GRMZM2G479760		OS06G10880	SB10G007090	5		GRMZM2G008166
OS07G42610	SB02G039360	8		GRMZM2G358987	OS03G28080	SB01G033150	4	GRMZM2G049070	GRMZM2G312078
OS02G54830	SB04G035570	8	GRMZM2G122284	GRMZM2G016362	OS06G08820	SB10G005930	7	GRMZM2G151913	GRMZM2G329195
OS07G47180	SB02G042260	8	GRMZM2G333433	GRMZM2G369814	OS03G22700	SB01G035420	3		GRMZM2G084347
OS04G33200	SB06G015200	8	GRMZM2G023946||AC192283	GRMZM2G103847	OS02G32504	SB04G021400	4	GRMZM2G062848
OS06G44860	SB10G026200	8		GRMZM2G101499	OS02G08070	SB04G005180	5		GRMZM2G168229
OS08G38850	SB07G028560	8	GRMZM2G113840	GRMZM2G332495	OS09G30330	SB02G027880	0		GRMZM2G031837
OS06G13050	SB10G008560	8	GRMZM2G110289		OS02G50770	SB04G028340	2	GRMZM2G442008	GRMZM2G439422
OS09G27910	SB02G026340	8		GRMZM2G090603	OS08G36520	SB07G022780	0		GRMZM2G142366
OS01G48130	SB03G030750	8	GRMZM2G058518		OS05G48850	SB09G028430	4	GRMZM2G031200
OS02G50550	SB04G028510	8		GRMZM2G455253	OS06G13820	SB10G008870	4	GRMZM2G404893	GRMZM2G157462
OS02G40664	SB04G026250	8	GRMZM2G094616	GRMZM2G047167	OS04G42980	SB06G022130	2		GRMZM2G075019
OS01G53990	SB03G034250	8	GRMZM2G177940	GRMZM2G120779	OS05G44600	SB09G026060	3	GRMZM2G043943	GRMZM2G071339
OS06G12740	SB10G008360	8	GRMZM2G136831		OS02G50900	SB04G028230	5	GRMZM2G116185
OS01G66200	SB03G042020	8	GRMZM2G306099		OS05G34760	SB09G020700	6	GRMZM2G070075
OS04G42960	SB06G022100	8	GRMZM2G173289	GRMZM2G075100	OS02G40550	SB04G026230	3	GRMZM2G094563
OS04G41950	SB06G021420	8	GRMZM2G160801||GRMZM2G358989		OS02G39550	SB04G025540	3	GRMZM2G106680
OS06G11490	SB10G007520	8		GRMZM2G122302	OS02G52180	SB04G027290	3	GRMZM2G045927	GRMZM2G008819
OS01G62990	SB03G039890	8	GRMZM2G065423		OS05G38000	SB09G022250	3		GRMZM2G144504
OS04G44780	SB06G023380	8	GRMZM2G078279		OS02G42650	SB04G027230	6	GRMZM2G169967
OS03G21140	SB01G036490	8	GRMZM2G003424	GRMZM2G086614	OS07G48410	SB02G043180	5	GRMZM2G311665
OS04G47480	SB06G025340	8	GRMZM2G041506	GRMZM2G061398	RICE_2_27197696_27198623	SB04G032210	0	GRMZM2G345991
OS03G04050	SB01G048160	8	GRMZM2G099598	GRMZM2G127050	OS10G39670	SB01G030290	0	GRMZM2G026767||GRMZM2G169080	GRMZM2G127050
OS01G64410	SB03G040760	8	GRMZM2G133311		OS05G36990	SB09G021750	0	GRMZM2G430871
OS01G61860	SB03G039030	8	GRMZM2G096470		OS05G38950	SB09G022880	7	GRMZM2G094951	GRMZM2G051050
OS08G40150	SB07G027510	8	GRMZM2G124638	GRMZM2G073199	OS09G31470	SB02G028500	7		GRMZM2G159926
OS02G36880	SB04G023990	8	GRMZM2G146380		OS04G38720	SB06G019010	7	GRMZM2G009892
OS01G63620	SB03G040270	8	GRMZM2G177518	GRMZM2G147544	OS05G37520	SB09G022010	7	GRMZM2G067122	GRMZM2G112284
OS01G72710	SB03G046345	7	GRMZM2G138258	GRMZM2G118619	OS05G32230	SB09G019180	4	GRMZM2G305851
OS04G49490	SB06G026510	7	GRMZM2G479665		OS02G46080	SB04G031580	2	GRMZM2G057907
OS01G64630	SB03G040880	7	GRMZM2G053284		OS05G36290	SB09G021660	2		GRMZM2G126010
OS07G03120	SB02G001880	7	GRMZM2G145654	GRMZM2G379575	OS03G55880	SB01G006940	2		GRMZM2G052467
OS01G71200	SB03G045340	7		GRMZM2G005459	OS05G30980	SB09G018610	4	GRMZM2G177001
OS06G40200	SB10G023640	7	GRMZM2G041831		OS02G10740	SB04G006930	2		GRMZM2G180971
OS08G32080	SB07G020300	7	GRMZM2G003304	GRMZM2G122076	OS09G21180	SB02G023650	3		GRMZM2G002915
OS05G49200	SB09G028740	7	GRMZM2G065757		OS01G47410	SB03G030350	3	GRMZM2G130333
OS05G46020	SB09G026830	7	GRMZM2G445421		OS01G51690	SB03G032800	2	GRMZM2G101405	GRMZM2G111354
OS01G54490	SB03G034580	7	GRMZM2G103666		OS05G44180	SB09G025760	2	GRMZM2G141756	GRMZM2G179264
OS02G43550	SB04G033250	7	GRMZM2G160563		OS04G46000	SB06G024180	5	GRMZM2G021530
OS04G42620	SB06G021870	7	GRMZM2G342509||AC226227		OS02G40260	SB04G026020	2	GRMZM2G114127	GRMZM2G042181
OS01G60670	SB03G038240	7	GRMZM2G145753		OS05G40050	SB09G023480	2	GRMZM2G128315
OS09G28850	SB02G026890	7	GRMZM2G072669	GRMZM2G066516	OS08G37104	SB07G023160	7	GRMZM2G442763
OS01G64590	SB03G040860	7	GRMZM2G135703	GRMZM2G042218	OS05G36900	SB09G021690	2	GRMZM2G371058
OS03G56220	SB01G006730	7	GRMZM2G427692		OS07G04150	SB02G002380	5	GRMZM2G148831	GRMZM2G044943
OS01G43460	SB03G028360	7	GRMZM2G011347	GRMZM2G074540	OS05G50770	SB09G029910	4	GRMZM2G080887	GRMZM2G518198
OS02G47020	SB04G030950	7	GRMZM2G162529	GRMZM2G026024	OS04G50880	SB06G027270	0	GRMZM2G463280
OS01G65350	SB03G041350	7	GRMZM2G091845		OS05G35520	SB09G021270	2		GRMZM2G147213
OS09G23780	SB02G024320	7	GRMZM2G092525		OS08G33210	SB07G020936	1	GRMZM2G056815
OS06G45950	SB10G026970	7		GRMZM2G462760	OS02G07110	SB04G004530	3	GRMZM2G050080	GRMZM2G471304
OS02G41860	SB04G026650	7	GRMZM2G154628	GRMZM2G081192	OS04G44060	SB06G022840	0	GRMZM2G178693||GRMZM2G174807
OS02G09080	SB04G005690	7	GRMZM2G109805		OS06G43780	SB10G025380	2		GRMZM2G158668
OS01G48170	SB03G030770	7	GRMZM2G159357	GRMZM2G060541	OS05G48820	SB09G028415	0	GRMZM2G122750	GRMZM2G125294
OS09G34280	SB02G030070	7	GRMZM2G169990	GRMZM2G022032	OS08G42960	SB07G025390	6	GRMZM2G045401
OS04G49430	SB06G026493	7	GRMZM2G318527		OS02G45974	SB04G031600	0	GRMZM2G029815	GRMZM2G170289
OS07G43070	SB02G039760	7	GRMZM2G116620	GRMZM2G147056	OS03G27010	SB01G033730	0	GRMZM2G107495	GRMZM2G128491
OS09G30160	SB02G027680	7	GRMZM2G393349	GRMZM2G018070	OS08G38460	SB07G028710	4	GRMZM2G005840
OS04G34080	SB06G016295	7	GRMZM2G079323	GRMZM2G055437	OS02G33630	SB04G022100	4	GRMZM2G048800
OS01G59350	SB03G037560	7		GRMZM2G125243	OS05G41280	SB09G024110	0		GRMZM2G080731
OS09G19930	SB02G023010	7	GRMZM2G081841		OS08G31030	SB07G019920	6	GRMZM2G141214
OS07G42960	SB02G039660	7		GRMZM2G365160	OS03G27230	SB01G033590	7	GRMZM2G396212
OS02G07930	SB04G005110	7	GRMZM2G146614	GRMZM2G421946	OS06G45040	SB10G026350	0	GRMZM2G085218	GRMZM2G354319
OS01G65880	SB03G041740	7	GRMZM2G039365		OS05G35140	SB09G020860	2	GRMZM2G153358
OS07G05390	SB02G002890	7	GRMZM2G011800		OS03G57110	SB01G006110	0	GRMZM2G058734
OS04G43990	SB06G022820	7	GRMZM2G079683	GRMZM2G306643	OS02G41840	SB04G026630	0	GRMZM2G468585
OS04G33110	SB06G015160	7	GRMZM2G154223		OS02G32469	SB04G021360	5	GRMZM2G020840
OS01G49160	SB03G031430	7	GRMZM2G083670	GRMZM2G006352	OS05G48010	SB09G027800	4	GRMZM2G069325
OS02G07880	SB04G005050	7	GRMZM2G349795	GRMZM2G124151	OS06G45110	SB10G026430	6	GRMZM2G103805	GRMZM2G061465
OS10G26540	SB01G022390	7	GRMZM2G104024	GRMZM2G084021	OS03G07380	SB01G045810	1	GRMZM2G162814	GRMZM2G178847
OS02G50600	SB04G028460	7	GRMZM2G142709	GRMZM2G469849	OS06G13760	SB10G008830	1	GRMZM2G000587
OS07G08460	SB02G004670	7	GRMZM2G149449		OS03G58350	SB01G005110	3	GRMZM2G159285||GRMZM2G013158	GRMZM2G152796||GRMZM2G077356
OS10G28710	SB01G021760	7	GRMZM2G040387		OS03G06420	SB01G046450	3		GRMZM2G115674
OS06G36680	SB10G022210	7	GRMZM2G076272		OS02G13310	SB04G008030	5	GRMZM2G161435
OS03G55530	SB01G007180	7	GRMZM2G099305		OS07G02540	SB02G001200	3	GRMZM2G458082
OS04G40874	SB06G020640	7	GRMZM2G130230		OS02G38840	SB04G025100	1	GRMZM2G031107
OS08G37104	SB07G023160	7	GRMZM2G442763		OS09G28850	SB02G026890	7	GRMZM2G072669	GRMZM2G066516
OS05G41800	SB09G024430	7		GRMZM2G089355	OS01G58400	SB03G037070	5	GRMZM2G383833
OS01G63060	SB03G039930	7	GRMZM2G004949	GRMZM2G169293	OS05G37910	SB09G022190	3	GRMZM2G067036
OS07G42370	SB02G039190	7	GRMZM2G089736	GRMZM2G101769	OS03G28940	SB01G033020	0	GRMZM2G117513
OS03G27230	SB01G033590	7	GRMZM2G396212		OS07G42960	SB02G039660	7		GRMZM2G365160
OS01G61080	SB03G038510	7	GRMZM2G148087	GRMZM2G036703	OS05G39720	SB09G023270	1	GRMZM2G169966
OS04G44440	SB06G023130	7		GRMZM2G465091	OS02G42380	SB04G026970	6	GRMZM2G178603||GRMZM2G077755	GRMZM2G078077
OS12G43620	SB08G022760	7	GRMZM2G049686		OS03G46790	SB01G012250	1	GRMZM2G120021
OS02G50930	SB04G028200	7	GRMZM2G053303		OS06G12680	SB10G008340	3		GRMZM2G003725
OS03G18070	SB01G038500	7	GRMZM2G074401	GRMZM2G128971	OS07G49310	SB02G043980	0		GRMZM2G129209
OS03G56580	SB01G006410	7	GRMZM2G163251	GRMZM2G112548	OS07G04560	SB02G002620	3	GRMZM2G479980	GRMZM2G309582
OS05G45050	SB09G026210	7	GRMZM2G004349		OS01G53520	SB03G033920	7	GRMZM2G031308	GRMZM2G002786
OS01G61640	SB03G038910	7	GRMZM2G173542	GRMZM2G066755	OS05G39070	SB09G022940	0		GRMZM2G068091
OS05G35380	SB09G021150	7	GRMZM2G038019		OS01G65440	SB03G041430	6		GRMZM2G114057
OS02G52340	SB04G033930	7	GRMZM2G046885	GRMZM2G370777	OS06G11330	SB10G007380	4	GRMZM2G174005
OS03G56250	SB01G006710	7		AC235547	OS07G04220	SB02G002470	5	GRMZM2G426156
OS07G07654	SB02G004070	7	GRMZM2G027603	GRMZM2G469469	OS03G58080	SB01G005330	3	GRMZM2G073429
OS08G33920	SB07G021410	7	GRMZM2G152552||AC198937		OS09G24690	SB02G024610	3	GRMZM2G166963
OS06G46799	SB10G027490	7	GRMZM2G150893		RICE_2_3327426_3327537	SB04G004250	0		GRMZM2G419953
OS07G03150	SB02G001910	7		GRMZM2G083572	OS03G55950	SB01G006900	5	GRMZM2G106293
OS03G04040	SB01G048170	7	GRMZM2G399948		OS10G39660	SB01G030310	5	GRMZM2G327907	GRMZM2G309655
OS02G34640	SB04G022440	7	GRMZM2G453301		OS04G35390	SB06G017020	1	GRMZM2G347314||GRMZM2G347315	GRMZM2G039399
OS03G24940	SB01G034550	7		GRMZM2G178650	OS07G44830	SB02G040980	3	GRMZM2G120954
OS01G53520	SB03G033920	7	GRMZM2G031308	GRMZM2G002786	OS05G45050	SB09G026210	7	GRMZM2G004349
OS05G39880	SB09G023370	6	GRMZM2G125037	GRMZM2G162466	OS01G60900	SB03G038370	3	GRMZM2G702036	GRMZM2G019612
OS06G14780	SB10G009380	6	GRMZM2G033175	GRMZM2G382711	OS02G49960	SB04G028880	2	GRMZM2G089357	GRMZM2G171051
OS05G37730	SB09G022060	6	GRMZM2G002128		OS01G63460	SB03G040160	2	GRMZM2G125522||GRMZM2G027914	GRMZM2G056986
OS09G20480	SB02G023340	6	GRMZM2G176780||GRMZM2G176759		OS08G31670	SB07G020120	0	GRMZM2G149553
OS09G34110	SB02G029910	6	GRMZM2G071147	GRMZM2G150503	OS08G42870	SB07G025480	3	GRMZM2G069476
OS05G37900	SB09G022180	6	GRMZM2G066225		OS01G63150	SB03G039940	3	GRMZM2G005000
OS02G50620	SB04G028450	6		GRMZM2G361693	OS06G13720	SB10G008820	2	GRMZM2G027627
OS03G59580	SB01G003940	6	GRMZM2G179133	GRMZM2G017532	OS07G11120	SB02G006440	3	GRMZM2G043275
OS04G33990	SB06G016230	6	GRMZM2G120983	GRMZM2G045844	OS02G33550	SB04G022010	1	GRMZM2G017991
OS08G33200	SB07G020930	6	GRMZM2G092595		OS09G23740	SB02G024300	3	GRMZM2G066876
OS02G09770	SB04G006130	6	GRMZM2G112429	GRMZM2G039848	OS06G42730	SB10G024800	5	GRMZM2G003718
OS05G48760	SB09G028390	6	GRMZM2G038183	GRMZM2G119303	OS01G48220	SB03G030820	2	GRMZM2G034526	GRMZM2G160990
OS12G07480	SB08G004600	6	GRMZM2G093895	GRMZM2G089638	OS11G07460	SB05G004800	3	GRMZM2G003944	GRMZM2G416524
OS08G35470	SB07G022280	6	GRMZM2G029527	GRMZM2G076389	OS09G26820	SB02G025750	2	GRMZM2G135817	GRMZM2G143029
OS01G41880	SB03G027110	6	GRMZM2G055276||GRMZM2G173805		OS05G51180	SB09G030400	3		GRMZM2G464401
OS12G41090	SB08G020690	6		GRMZM2G105766	OS03G43440	SB01G014090	3	GRMZM2G472643
OS01G47760	SB03G030680	6	GRMZM2G023237	GRMZM2G178886	OS05G48930	SB09G028500	2	GRMZM2G318180	GRMZM2G311898
OS03G21720	SB01G036170	6		GRMZM2G067546	OS07G48229	SB02G043010	3	GRMZM2G158274
OS09G35810	SB02G030510	6	GRMZM2G052474		OS08G43350	SB07G025110	3	GRMZM2G000435	GRMZM2G147452
OS04G34050	SB06G016290	6	GRMZM2G369742	GRMZM2G060720	OS02G33600	SB04G022090	3	GRMZM2G346837
OS01G65260	SB03G041300	6	GRMZM2G339699		OS05G35580	SB09G021310	3		AC188838||GRMZM2G018238
OS05G34980	SB09G020790	6		GRMZM2G164814	OS01G66010	SB03G041840	2		GRMZM2G096407
OS02G32550	SB04G021450	6	GRMZM2G108267		OS04G33260	SB06G015250	2	GRMZM2G134235
OS09G21340	SB02G023720	6	GRMZM2G414813		OS08G32500	SB07G020510	2	GRMZM2G115635
OS04G44150	SB06G022880	6	GRMZM2G006964		OS02G41954	SB04G026690	2	GRMZM2G153359
OS03G18910	SB01G037850	6	GRMZM2G377215		OS07G49080	SB02G043770	2		GRMZM2G353276
OS01G49190	SB03G031470	6	GRMZM2G041275		OS05G47980	SB09G027790	3	GRMZM2G113408	GRMZM2G021331
OS03G19190	SB01G037640	6	GRMZM2G022945		OS07G49010	SB02G043750	0	GRMZM2G414141
OS01G45380	SB03G029240	6	GRMZM2G088299	GRMZM2G063684	OS05G50190	SB09G029440	3		GRMZM2G063069
OS06G47890	SB10G028340	6	GRMZM2G418805	GRMZM2G113244	OS02G05700	SB04G003655	0	GRMZM2G147800
OS01G66420	SB03G042180	6	GRMZM2G080917	GRMZM2G172001	OS05G34640	SB09G020610	3	GRMZM2G038182	GRMZM2G032142
OS08G42370	SB07G026030	6	GRMZM2G068657	GRMZM2G012544	OS09G33450	SB02G029440	3	GRMZM2G404881||GRMZM2G104754	GRMZM2G179002
OS03G43390	SB01G014150	6	GRMZM2G141332		OS12G40860	SB08G020560	3	GRMZM2G100121	GRMZM2G441768
OS05G41060	SB09G023880	6	GRMZM2G157596		OS01G59790	SB03G037760	2	GRMZM2G357399
OS07G44610	SB02G040830	6	GRMZM2G104443		OS03G25270	SB01G034440	1	GRMZM2G040515	GRMZM2G105523
OS01G59440	SB03G037580	6	GRMZM2G050375	GRMZM2G121820	OS05G41230	SB09G024080	1	GRMZM2G088861
OS02G06560	SB04G004220	6		GRMZM2G419994	OS06G46970	SB10G027660	2	AC225718
OS01G55750	SB03G035350	6	GRMZM2G166946		OS05G43760	SB09G025340	2	GRMZM2G120151	GRMZM2G035944
OS03G21550	SB01G036250	6	GRMZM2G056462		OS07G48290	SB02G043070	2	GRMZM2G080001
OS03G55080	SB01G007570	6	GRMZM2G143204		OS07G02060	SB02G000960	4	GRMZM2G018721
OS08G42350	SB07G026040	6	GRMZM2G368827		RICE_9_19696345_19697519	SB02G029430	0	GRMZM2G104678
OS07G42860	SB02G039550	6	GRMZM2G079629		OS03G27420	SB01G033460	0	GRMZM2G305400
OS04G47240	SB06G025160	6	GRMZM2G175504		OS02G44642	SB04G032420	1		GRMZM2G093316
OS02G50040	SB04G028790	6	GRMZM2G151257		OS06G14540	SB10G009270	1	GRMZM2G154678	GRMZM2G455642
OS01G48440	SB03G030990	6	GRMZM2G037469		OS05G48600	SB09G028220	5	GRMZM2G150264	GRMZM2G103628
OS03G43930	SB01G013710	6	GRMZM2G423337		OS12G41860	SB08G021350	5	GRMZM2G003509	GRMZM2G178102
OS02G45450	SB04G031950	6	GRMZM2G137341		OS04G48350	SB06G025900	4	GRMZM2G042756
OS05G39260	SB09G023050	6	GRMZM2G075782		OS01G61470	SB03G038810	5		GRMZM2G440125
OS05G50490	SB09G029700	6	GRMZM2G163883	GRMZM2G019771	OS01G44090	SB03G028790	4	GRMZM2G429873	GRMZM2G177076
OS03G30420	SB01G032440	6	GRMZM2G470442	GRMZM2G168392	OS07G41240	SB02G038670	1	GRMZM2G138008
OS05G47690	SB09G027580	6	GRMZM2G004828		OS01G49660	SB03G031730	1		GRMZM2G091973
OS09G30010	SB02G027510	6	GRMZM2G133053		OS08G38270	SB07G028780	1	GRMZM2G422419	GRMZM2G301908
OS02G09480	SB04G005940	6	GRMZM2G145444		OS06G43090	SB10G024950	5	GRMZM2G055572	GRMZM2G078820
OS01G60730	SB03G038270	6	GRMZM2G426613	GRMZM2G440125	OS05G40020	SB09G023450	1	GRMZM2G390436
OS02G34430	SB04G022300	6	GRMZM2G040964		OS04G35080	SB06G016790	1	GRMZM2G050861
OS02G44770	SB04G032300	6	GRMZM2G005996	GRMZM2G303244	OS04G47320	SB06G025240	1	GRMZM2G027891	GRMZM2G090627
OS05G43660	SB09G025300	6	GRMZM2G070192		OS01G55850	SB03G035430	0	GRMZM2G409970
OS05G40630	SB09G023720	6	GRMZM2G145655	GRMZM2G440009	OS01G60170	SB03G038010	1	GRMZM2G344630	GRMZM2G433137
OS01G63480	SB03G040180	6	GRMZM2G165192	GRMZM2G115422	OS05G37660	SB09G022030	0		GRMZM2G094017
OS09G35630	SB02G030380	6	GRMZM2G017013	GRMZM2G035170	OS08G43270	SB07G025170	3	GRMZM2G079956	GRMZM2G157481
OS02G43870	SB04G033010	6	GRMZM2G056903	GRMZM2G150714	OS04G46320	SB06G024440	1	GRMZM2G328781	GRMZM2G303768
OS12G41200	SB08G020780	6	GRMZM2G092947	GRMZM2G701688	OS03G43684	SB01G013930	5	GRMZM2G355771
OS09G20240	SB02G023170	6	GRMZM2G166692	GRMZM2G051752	OS08G31510	SB07G020070	3	GRMZM2G032295||AC197047
OS06G12960	SB10G008470	6	GRMZM2G474844	GRMZM2G474088	OS02G50810	SB04G028310	6	GRMZM2G031991	GRMZM2G036282
OS01G47710	SB03G030635	6	GRMZM2G031882	GRMZM2G133972	OS05G48990	SB09G028562	5	GRMZM2G409881
OS02G43590	SB04G033230	6	GRMZM2G031952		OS04G46079	SB06G024230	4	GRMZM2G123373	GRMZM2G027173
OS04G42250	SB06G021640	6	GRMZM2G158083		OS02G39850	SB04G025760	4	GRMZM2G035584
OS05G31690	SB09G018880	6	GRMZM2G176465		OS01G72190	SB03G045870	0	GRMZM2G066005	GRMZM2G101080
OS02G09150	SB04G005710	6	GRMZM2G069095	GRMZM2G104419	OS06G43660	SB10G025280	6	GRMZM2G170927
OS01G43550	SB03G028440	6	GRMZM2G105140	GRMZM2G149683	OS05G50700	SB09G029850	2		GRMZM2G414315
OS07G09580	SB02G005710	6	GRMZM2G458665	GRMZM2G008862	RICE_3_33433629_33434576	SB01G004720	0	GRMZM2G137338
OS05G43880	SB09G025470	6	GRMZM2G127757		OS01G55240	SB03G035000	5	GRMZM2G022679	GRMZM2G031724
OS02G53380	SB04G034670	6	GRMZM2G023608	GRMZM2G165961	OS06G10560	SB10G006800	2	GRMZM2G033805
OS02G42990	SB04G033550	6	GRMZM2G391596	GRMZM2G432060	OS04G45370	SB06G023800	4	GRMZM2G429254	GRMZM2G425072
OS04G37920	SB06G018510	6	GRMZM2G049549		OS02G36380	SB04G023680	6	GRMZM2G024739	GRMZM2G104262
OS09G27050	SB02G025940	6	GRMZM2G050172		OS08G35620	SB07G022430	5	GRMZM2G021074
OS02G36590	SB04G023820	6	GRMZM2G056505	GRMZM2G106752	OS04G38520	SB06G018770	4	GRMZM2G094792	GRMZM2G017426
OS02G44080	SB04G032900	6	GRMZM2G056908	GRMZM2G027098	OS04G46490	SB06G024580	0	GRMZM2G121275	GRMZM2G125023
OS09G23660	SB02G024270	6	GRMZM2G126507||AC191687		OS08G33160	SB07G020910	4		GRMZM2G151519
OS01G61910	SB03G039070	6	GRMZM2G049510	GRMZM2G026871	OS05G39000	SB09G022910	4		GRMZM2G422641
OS05G42190	SB09G024730	6		GRMZM2G082792	OS01G57570	SB03G036660	5	GRMZM2G138800	GRMZM2G159643
OS07G08790	SB02G004800	6		AC148167||GRMZM2G082809	OS03G58480	SB01G005000	5	GRMZM2G163912	GRMZM2G121176
OS12G40790	SB08G020500	6	GRMZM2G180195	GRMZM2G116574	OS03G43360	SB01G014160	4	GRMZM2G141379
OS06G15820	SB10G009760	6	GRMZM2G031479	GRMZM2G020943	OS02G49770	SB04G029020	4	GRMZM2G075260	GRMZM2G125455
OS10G39620	SB01G030340	6	GRMZM2G136769	GRMZM2G170843	OS03G03920	SB01G048260	3	GRMZM2G057158
OS09G32250	SB02G028860	6		GRMZM2G007885	OS08G40790	SB07G026920	0	GRMZM2G084149	GRMZM2G075655
OS05G34650	SB09G020620	6	GRMZM2G013964		OS01G66350	SB03G042150	6	GRMZM2G081188
OS01G66120	SB03G041920	6	GRMZM2G014653		OS05G34830	SB09G020750	4	GRMZM2G180328||GRMZM2G147867	GRMZM2G134687
OS01G60280	SB03G038090	6	GRMZM2G069201		OS05G40270	SB09G023620	5	GRMZM2G174585
OS05G44630	SB09G026070	6		GRMZM2G058690	OS01G53980	SB03G034245	4	GRMZM2G177929
OS02G37070	SB04G024140	6	GRMZM2G077612	GRMZM2G456422	RICE_4_23082722_23082824	SB06G019355	4	GRMZM2G526267
OS01G66350	SB03G042150	6	GRMZM2G081188		OS05G34650	SB09G020620	6	GRMZM2G013964
OS07G41580	SB02G038870	6	GRMZM2G384528	GRMZM2G180947	OS03G29970	SB01G032590	1	GRMZM2G449695
OS05G48980	SB09G028560	6	GRMZM2G020661	GRMZM2G124758	OS01G47730	SB03G030650	5	GRMZM2G023436	GRMZM2G420935
OS06G43660	SB10G025280	6	GRMZM2G170927		OS02G09150	SB04G005710	6	GRMZM2G069095	GRMZM2G104419
OS02G36380	SB04G023680	6	GRMZM2G024739	GRMZM2G104262	OS04G37920	SB06G018510	6	GRMZM2G049549
OS02G33680	SB04G022120	6	GRMZM2G071484||GRMZM2G303964	GRMZM2G127690	OS04G34140	SB06G016300	4		GRMZM2G059042
OS02G52930	SB04G034330	6	GRMZM2G149452		OS06G10750	SB10G006950	2	GRMZM2G088053	GRMZM2G108537
OS01G45460	SB03G029280	6	GRMZM2G473976		OS05G50170	SB09G029420	0		GRMZM2G406177
OS02G50810	SB04G028310	6	GRMZM2G031991	GRMZM2G036282	OS06G12960	SB10G008470	6	GRMZM2G474844	GRMZM2G474088
OS02G49760	SB04G029030	6	GRMZM2G375116	GRMZM2G125387	OS06G15910	SB10G009770	5		GRMZM2G120163
OS02G54890	SB04G035630	5	GRMZM2G110558	GRMZM2G042179	OS06G08810	SB10G005920	1	GRMZM2G455306	GRMZM2G168274
OS03G58570	SB01G004950	5	GRMZM2G312091		OS07G09000	SB02G005080	2	GRMZM2G146940
OS02G35470	SB04G023100	5	GRMZM2G113453	GRMZM2G054109	OS04G36660	SB06G017740	2	GRMZM2G147158
OS07G10420	SB02G006070	5	GRMZM2G088469		OS03G59180	SB01G004410	0	GRMZM2G046267
OS06G44210	SB10G025800	5	GRMZM2G091061	GRMZM2G019812	OS02G08364	SB04G005450	3	GRMZM2G360455
OS01G61350	SB03G038700	5	GRMZM2G032763	GRMZM2G135367	OS05G39450	SB09G023110	0	AC209257	GRMZM2G010319
OS05G34320	SB09G020420	5	GRMZM2G121514		OS01G66690	SB03G042340	2	GRMZM2G328795
OS08G42420	SB07G025960	5	GRMZM2G138425		OS09G33520	SB02G029490	2	GRMZM2G411899
OS06G15330	SB10G009480	5		GRMZM2G012717	OS02G49870	SB04G028920	0	GRMZM2G041991
OS02G52540	SB04G034056	5		GRMZM2G015912	OS06G11030	SB10G007165	3	GRMZM2G038436
OS06G09390	SB10G006260	5	GRMZM2G171179		OS02G54160	SB04G035160	2	GRMZM2G110333	GRMZM2G018398
OS05G50250	SB09G029490	5		GRMZM2G001991	OS01G45200	SB03G029100	2	GRMZM2G029547	GRMZM2G179685
OS06G10660	SB10G006860	5		GRMZM2G048194	OS02G53000	SB04G034400	3	GRMZM2G154301
OS07G41180	SB02G038630	5	GRMZM2G069405		OS03G30550	SB01G032380	2		GRMZM2G138987
OS03G06190	SB01G046585	5	GRMZM2G000749		OS10G30100	SB01G021230	2	AC212390
OS06G12250	SB10G008040	5	GRMZM2G124276		OS02G51150	SB04G027990	2	GRMZM2G114423
OS08G39460	SB07G027930	5	GRMZM2G020478		OS09G31210	SB02G028250	5	GRMZM2G111152	GRMZM2G134332
OS03G43580	SB01G013960	5	GRMZM2G039187		OS12G41160	SB08G020740	0		GRMZM2G390371||GRMZM2G390374
OS04G37950	SB06G018520	5	GRMZM2G049568	GRMZM2G036186	OS02G36400	SB04G023700	1	GRMZM2G072146
OS03G25760	SB01G034210	5		GRMZM2G353117	OS07G43970	SB02G040370	5	GRMZM2G318843
OS05G47900	SB09G027740	5	GRMZM2G113177		OS01G49280	SB03G031510	0		GRMZM2G166192
OS04G35410	SB06G017025	5	GRMZM2G057006	GRMZM2G072513	OS02G34650	SB04G022450	4	GRMZM2G113439
OS02G45520	SB04G031920	5	GRMZM2G166976		OS04G48390	SB06G025950	0	GRMZM2G086430
OS02G09930	SB04G006260	5		GRMZM2G105631	OS06G42020	SB10G024640	4	GRMZM2G443715
OS01G48444	SB03G030995	5	GRMZM2G037368	GRMZM2G163848	OS05G48590	SB09G028210	5		GRMZM2G700512
OS01G57220	SB03G036410	5	GRMZM2G169773		OS05G42330	SB09G024810	2	GRMZM2G174730	GRMZM2G100809
OS02G10640	SB04G006830	5	GRMZM2G171604		OS06G40560	SB10G023770	0	GRMZM2G074037
OS02G46480	SB04G031300	5	GRMZM2G169044		OS04G49954	SB06G026850	0	GRMZM2G031904
OS04G47620	SB06G025400	5		GRMZM2G142832	OS02G44920	SB04G032190	0		GRMZM2G073359
OS05G48590	SB09G028210	5		GRMZM2G700512	OS01G48444	SB03G030995	5	GRMZM2G037368	GRMZM2G163848
OS05G43690	SB09G025330	5	GRMZM2G143791	GRMZM2G154936	OS01G55820	SB03G035410	0	GRMZM2G162768
OS01G54080	SB03G034310	5	GRMZM2G323622	GRMZM2G124883	OS05G44560	SB09G026020	0	GRMZM2G335739	GRMZM2G173666
OS05G34770	SB09G020710	5	GRMZM2G070199	GRMZM2G010348	OS01G66180	SB03G042000	0	GRMZM2G081883
OS03G20440	SB01G036940	5	GRMZM2G128644	GRMZM2G014839	OS07G48710	SB02G043570	5		GRMZM2G101409
OS02G50200	SB04G028720	5	GRMZM2G385979		OS06G14280	SB10G009120	5	GRMZM2G063743	GRMZM2G059634
OS02G52920	SB04G034320	5	GRMZM2G414569		OS06G10760	SB10G006960	2		GRMZM2G136058
OS02G43170	SB04G033440	5	GRMZM2G110541		OS04G45690	SB06G023960	2	GRMZM2G131982	GRMZM2G098442
OS05G39520	SB09G023140	5		GRMZM2G100244	OS01G61250	SB03G038660	2	GRMZM2G045249
OS04G44290	SB06G022970	5	GRMZM2G133012||AC226227		OS02G42220	SB04G026840	3		GRMZM2G368398
OS07G43970	SB02G040370	5	GRMZM2G318843		OS03G25760	SB01G034210	5		GRMZM2G353117
OS01G48850	SB03G031230	5	GRMZM2G077401		OS05G48270	SB09G027990	5		GRMZM2G108851
OS06G14280	SB10G009120	5	GRMZM2G063743	GRMZM2G059634	OS02G50200	SB04G028720	5	GRMZM2G385979
OS04G49970	SB06G026870	5	GRMZM2G092128	GRMZM2G169690	OS02G46500	SB04G031280	0	GRMZM2G168980
OS03G21890	SB01G036050	5	GRMZM2G173387		OS07G48130	SB02G042930	0	GRMZM2G166738
OS09G31970	SB02G028630	5	GRMZM2G001645	GRMZM2G058095	OS08G40180	SB07G027480	2		GRMZM2G393337
OS09G31210	SB02G028250	5	GRMZM2G111152	GRMZM2G134332	OS08G39460	SB07G027930	5	GRMZM2G020478
OS05G50230	SB09G029480	5	GRMZM2G026188		OS01G45250	SB03G029160	3	GRMZM2G122028	GRMZM2G176182
OS06G48330	SB10G028680	5	GRMZM2G162065		OS02G05620	SB04G003570	1	GRMZM2G067313	GRMZM2G166032
OS02G50860	SB04G028280	5	GRMZM2G415327	GRMZM2G001953	OS06G12790	SB10G008380	3	GRMZM2G102946
OS09G29430	SB02G027290	5		GRMZM2G040933	OS08G37600	SB07G029165	3	GRMZM2G134544
OS05G41210	SB09G024040	5	GRMZM2G117582	GRMZM2G004703	OS01G59530	SB03G037630	1	GRMZM2G036099
OS03G17690	SB01G038760	5	GRMZM2G137839	GRMZM2G054300	OS07G49400	SB02G044060	0		GRMZM2G140667
OS02G45310	SB04G032010	5	GRMZM2G045675	GRMZM2G394528	OS04G48230	SB06G025840	3	GRMZM2G128179	GRMZM2G077036
OS07G08220	SB02G004450	5	GRMZM2G071370		OS03G58190	SB01G005220	4	GRMZM2G068936	GRMZM2G007867
OS06G47310	SB10G027930	5	GRMZM2G026881		OS02G06380	SB04G004070	3	GRMZM2G085513
OS07G48710	SB02G043570	5		GRMZM2G101409	OS03G20440	SB01G036940	5	GRMZM2G128644	GRMZM2G014839
OS02G44300	SB04G032690	5	GRMZM2G329532	GRMZM2G174537	OS04G46780	SB06G024750	1	GRMZM2G462258
OS06G47330	SB10G027960	5	GRMZM2G113613		OS02G06340	SB04G004020	3		GRMZM2G052740
OS02G44000	SB04G032930	5		GRMZM2G323719	OS04G46460	SB06G024550	4	GRMZM2G132777
OS06G37510	SB10G022610	5		GRMZM2G162295	OS02G12750	SB04G007710	2	GRMZM2G014826
OS05G47550	SB09G027370	5	GRMZM2G114513	GRMZM2G170760	OS01G50010	SB03G031930	3	GRMZM2G055450
OS04G38870	SB06G019100	5	GRMZM2G102499	GRMZM2G078641	OS02G36974	SB04G024040	0	GRMZM2G459166
OS10G33960	SB01G019120	5	GRMZM2G469551		OS03G01890	SB01G050000	3		GRMZM2G109987
OS01G71050	SB03G045240	5	GRMZM2G053273	GRMZM2G303575||GRMZM2G315037	OS05G30950	SB09G018590	3		GRMZM2G019596
OS02G31030	SB04G021010	5	GRMZM2G018820		OS04G32320	SB06G014320	1	GRMZM2G015973
OS04G41100	SB06G020890	5	GRMZM2G139038	GRMZM2G179097	OS02G39010	SB04G025180	1	GRMZM2G115755
OS07G07646	SB02G004060	5	GRMZM2G107408		OS03G58090	SB01G005320	1	GRMZM2G170851	GRMZM2G099615
OS01G46950	SB03G030040	5	GRMZM2G003354		OS05G49430	SB09G029000	1	GRMZM2G011662
OS05G46000	SB09G026820	5	GRMZM2G090034||AC209819		OS01G51700	SB03G032810	1		GRMZM2G179215
OS10G39010	SB01G030635	5	GRMZM2G506660		OS03G03280	SB01G048910	4	GRMZM2G119736
OS05G41900	SB09G024530	5	GRMZM2G073535		OS01G58220	SB03G036990	1	GRMZM2G113414
OS03G47500	SB01G012070	5	GRMZM2G149028	GRMZM2G129150	OS12G43930	SB08G022940	1	GRMZM2G400268
OS08G41280	SB07G026640	5	GRMZM2G386209	GRMZM2G065244	OS09G32470	SB02G029010	0	GRMZM2G066202||GRMZM2G066219
OS03G07480	SB01G045720	5	GRMZM2G034302	GRMZM2G087901	OS10G26470	SB01G022430	3	GRMZM2G083248
OS08G33990	SB07G021440	5	GRMZM2G438438	GRMZM2G353734||GRMZM2G370863	OS09G24810	SB02G024650	1	GRMZM2G161315	GRMZM2G051955
OS07G43050	SB02G039740	5	GRMZM2G025281	GRMZM2G077823	OS03G27030	SB01G033710	1	GRMZM2G104353
OS11G06170	SB05G003810	5	GRMZM2G079365	GRMZM2G118393	OS12G06520	SB08G003940	1	GRMZM2G136266	GRMZM2G146020
OS01G40094	SB03G026070	5	GRMZM2G134628		OS05G51510	SB09G030600	1	GRMZM2G102255	GRMZM2G383807
OS02G46620	SB04G031220	5	GRMZM2G413829		OS04G50176	SB06G027010	0	GRMZM2G059689
OS02G12580	SB04G007570	5	GRMZM2G133464||AC186310		OS06G37660	SB10G022710	4	GRMZM2G119546
OS09G30400	SB02G027950	5	GRMZM2G151407	GRMZM2G052671	OS08G38990	SB07G028420	2		GRMZM2G027972
OS02G43660	SB04G033180	5	GRMZM2G097851	GRMZM2G082940	OS04G46130	SB06G024270	0		AC212835
OS09G28880	SB02G026900	5	GRMZM2G075837		OS08G37150	SB07G023190	0	GRMZM2G117347
OS07G45280	SB02G041320	5	GRMZM2G317535	GRMZM2G082448	OS03G24520	SB01G034780	3	GRMZM2G108530
OS09G24970	SB02G024710	5	GRMZM2G472903	GRMZM2G359521||GRMZM2G359514	OS08G34120	SB07G021540	0	GRMZM2G067235||AC205057
OS06G44450	SB10G026060	5	GRMZM2G038783		OS02G08150	SB04G005250	4	GRMZM2G148772
OS02G15540	SB04G009200	5		GRMZM2G052920	OS06G33880	SB10G020590	3		GRMZM2G102888
OS02G51500	SB04G027780	5	GRMZM2G012269	GRMZM2G025470	OS06G12020	SB10G007900	3	GRMZM2G003023
OS09G25090	SB02G024770	5	GRMZM2G129018	GRMZM2G330049	OS08G34240	SB07G021660	4	GRMZM2G429940	GRMZM2G052067
OS04G49510	SB06G026530	5	GRMZM2G314396	GRMZM2G321239	OS02G46090	SB04G031570	4		GRMZM2G081310
OS05G38500	SB09G022560	5		GRMZM2G421415	OS01G62380	SB03G039440	3		GRMZM2G035933
OS05G28730	SB09G017110	5	GRMZM2G068436	GRMZM2G023755	OS01G19800	SB03G012510	4		GRMZM2G378054
OS04G46330	SB06G024450	5	GRMZM2G346982		OS02G43900	SB04G033000	2	GRMZM2G056889	GRMZM2G004180
OS03G22810	SB01G035350	5	GRMZM2G169890	GRMZM2G058522	OS07G46990	SB02G042170	4	GRMZM2G025992
OS07G10840	SB02G006320	5	GRMZM2G340656		OS03G59430	SB01G004130	0	GRMZM2G077181
OS02G32990	SB04G021680	5	GRMZM2G115480		OS04G33610	SB06G015560	4	GRMZM2G373396	GRMZM2G157120
OS05G48270	SB09G027990	5		GRMZM2G108851	OS01G48850	SB03G031230	5	GRMZM2G077401
OS07G48430	SB02G043200	5	GRMZM2G131026	GRMZM2G003331	OS03G21120	SB01G036510	4	GRMZM2G124209
